# Supplementary material
Source: publisher figshare collection journal article supplement (https://gsapubs.figshare.com/articles/dataset/_/13708324)

# Effect of different roof thicknesses

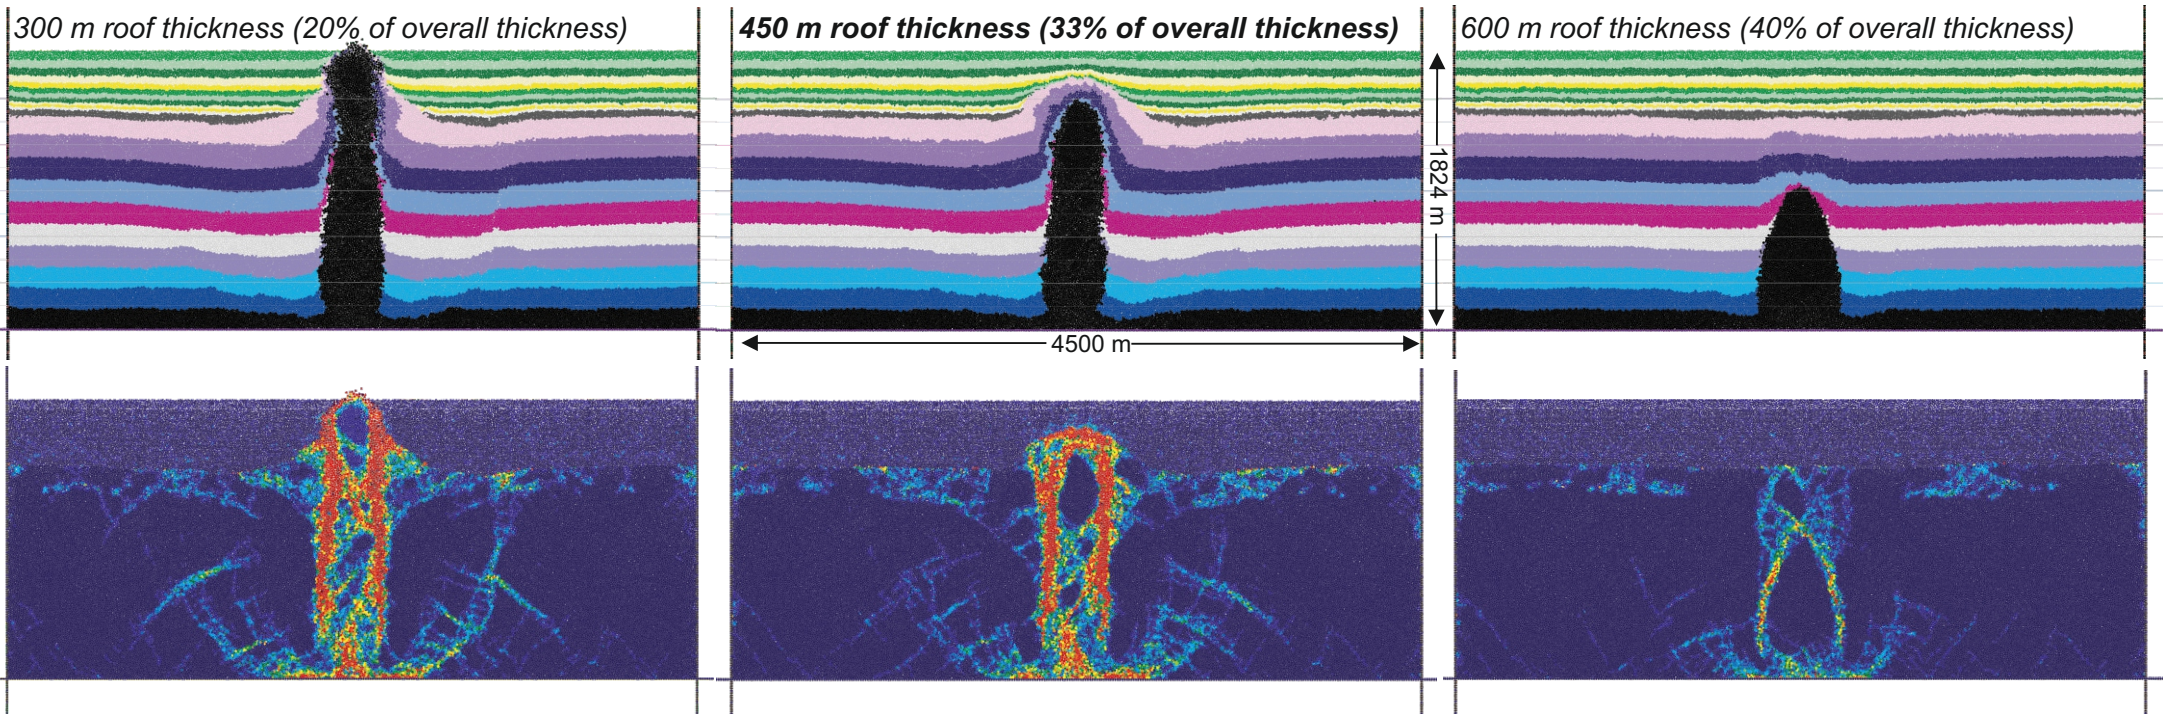

# Effect of different diapir widths

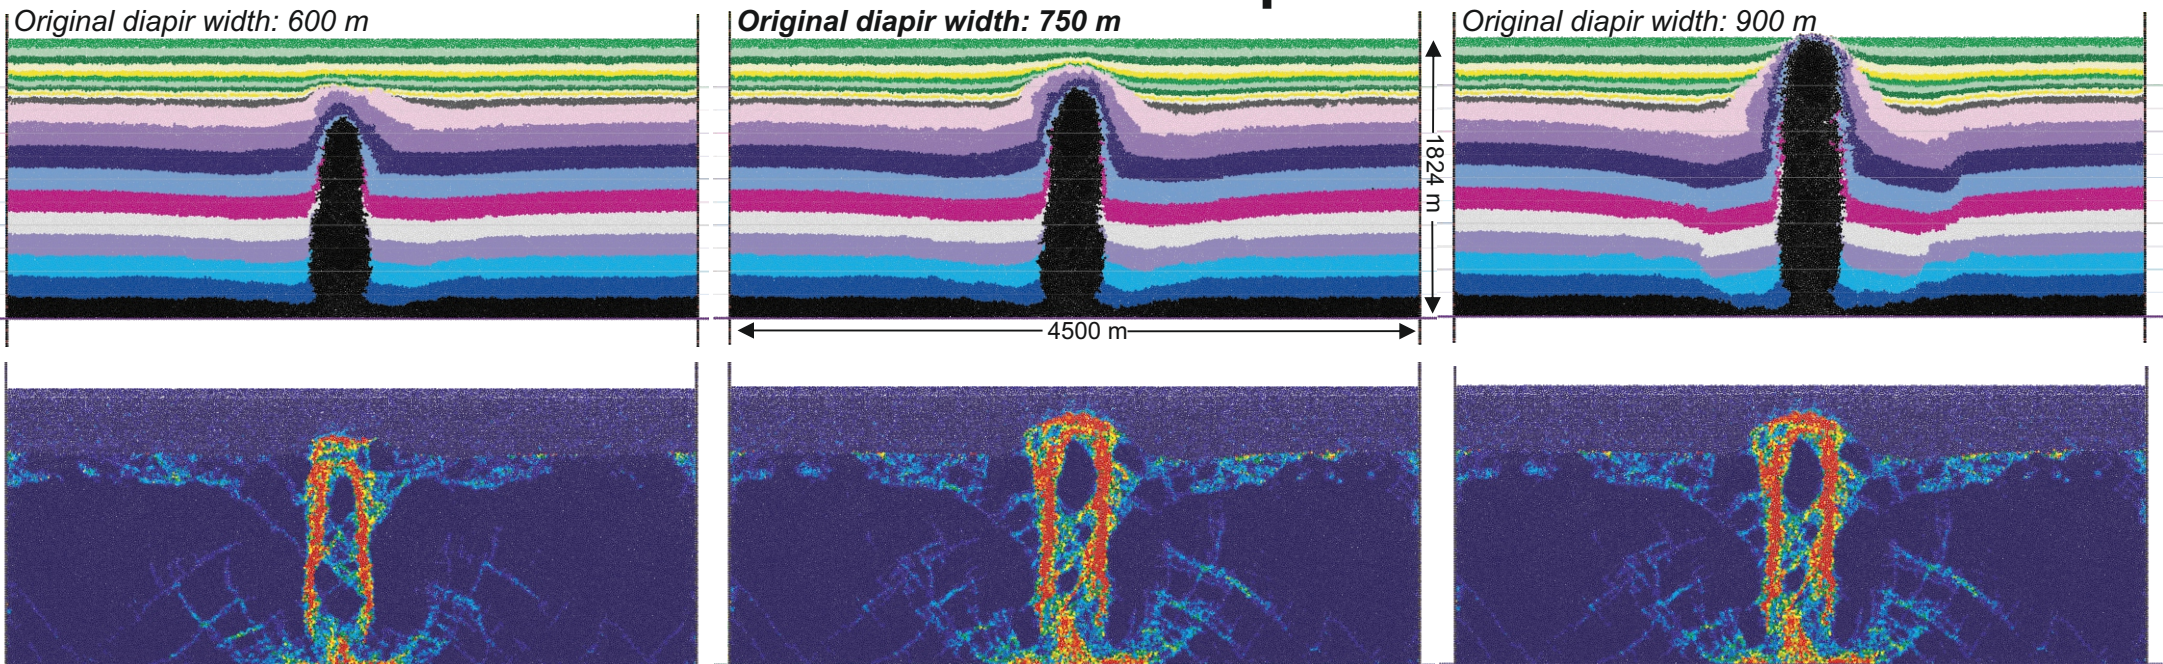

Supplement: Supplementary file 1 [file 1]
